# Supplementary material
Source: PubMed Central journal article supplement (PMC5445506)
Supplement: am6b14262_si_001.pdf [file am6b14262_si_001.pdf]

**Effect of Variations in Micro-patterns and Surface Modulus on Marine Fouling of Engineering Polymers**

Agata Maria Brzozowska<sup>a</sup>, Stan Maassen<sup>a,b</sup>, Rubayn Goh Zhi Rong<sup>a,c</sup>, Peter Imre Benke<sup>e,f</sup>,  
Lim Chin-Sing<sup>d</sup>, Ezequiel M. Marzinelli<sup>g,h</sup>, Dominik Jańczewski<sup>a,\*</sup>, Serena Lay-Ming Teo<sup>d,\*</sup>,  
G. Julius Vancso<sup>j,k</sup>

<sup>a</sup> Institute of Materials Research and Engineering, Agency for Science, Technology and Research, 2 Fusionopolis Way, Innovis, #08-03, Singapore 138634,

<sup>b</sup> Faculty of Science and Technology, University of Twente, Drienerlolaan 5, 7522 NB Enschede, the Netherlands,

<sup>c</sup> School of Materials Science and Engineering, Nanyang Technological University, 50 Nanyang Avenue, 639798 Singapore,

<sup>d</sup> St John's Island National Marine Laboratory, Tropical Marine Science Institute, National University of Singapore, 18 Kent Ridge Road, 119227 Singapore,

<sup>e</sup> Singapore Centre on Environmental Life Sciences Engineering, Nanyang Technological University, Singapore, 60 Nanyang Drive, 637551 Singapore

<sup>f</sup> Environmental Research Institute, National University of Singapore, 21 Lower Kent Ridge Road, 119077 Singapore

<sup>g</sup> Centre for Marine Bio-Innovation, School of Biological, Earth and Environmental Sciences, University of New South Wales, Sydney, NSW 2052, Australia,

<sup>h</sup> Sydney Institute of Marine Science, 19 Chowder Bay Rd, Mosman, NSW 2088, Australia

<sup>i</sup> Laboratory of Technological Processes, Faculty of Chemistry, Warsaw University of Technology, Noakowskiego 3, 00-664 Warsaw, Poland,

<sup>j</sup> Institute of Chemical and Engineering Sciences, Agency for Science, Technology and Research, 1 Pesek Road, 627833 Singapore,

<sup>k</sup> MESA+ Institute for Nanotechnology, Materials Science and Technology of Polymers, University of Twente, 7500 AE Enschede, the Netherlands.

**Corresponding authors**

\* S. L. M. Teo: E-mail: tmsteolm@nus.edu.sg. Tel: +65 6774 9887. Fax: +65 6776 1455.

\* D. Jańczewski: E-mail: dominik.janczewski@ch.pw.edu.pl. Tel: +48 22 234 5583. Fax: +48 22 234 5504.

\* G. J. Vancso: E-mail: g.j.vancso@utwente.nl. Tel.: +31 53 489 2974. Fax: +31 53 489 3823.

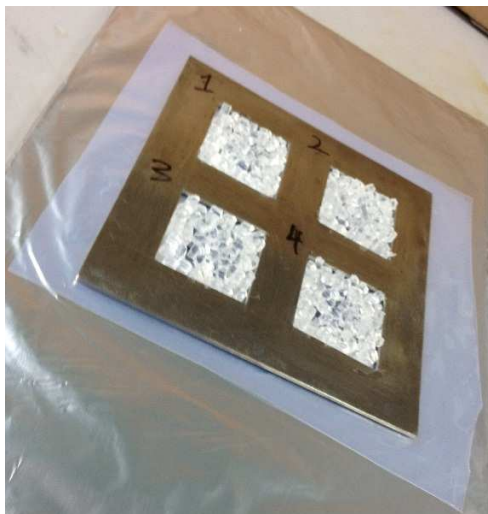

Figure S1. Preparation of polymer and moulds for pattern replication in PU. Image shows metal frame placed on fluorinated sheet (white). Within each opening of the frame (1-4) there is a silicone mould placed (invisible in the image), subsequently covered with PU pellets. The thus prepared frame was subsequently placed between the plates of the hot plate, as described in the manuscript.

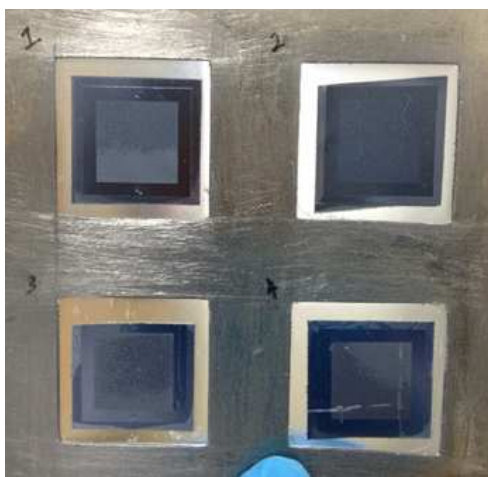

Figure S2. PMMA samples after casting, using hot press, and prior demoulding. In window “4” a mould cracked during the compression moulding is visible.

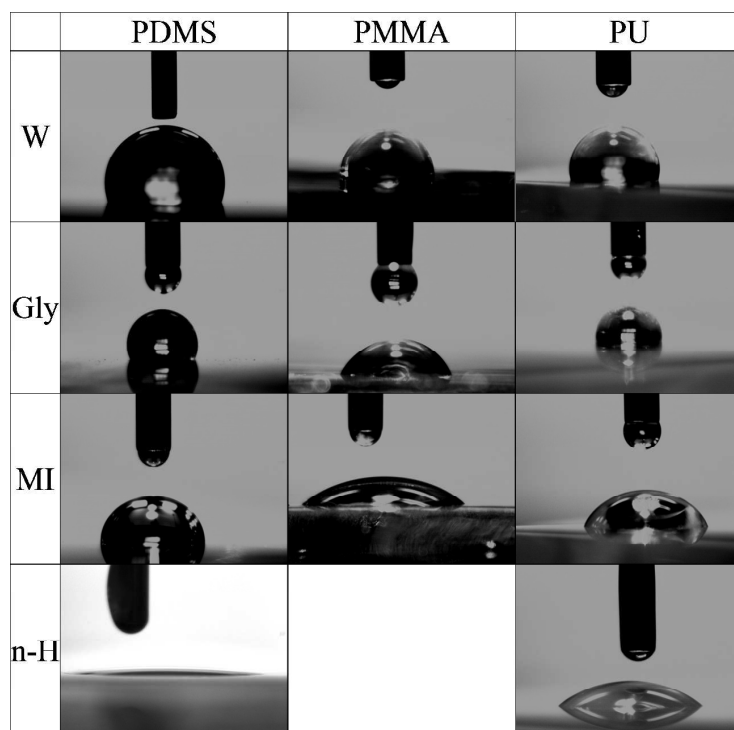

Figure S3. Examples of static contact angle measurements on smooth PDMS, PMMA and PU using water (W), anhydrous glycerol (Gly), methylene iodide (MI) and n-hexadecane (n-H). Static contact angle of n-H on PMMA could not have been determined due to rapid spreading (complete wetting) of the liquid on PMMA surface.

Supporting Information

Table S1. Results of static and dynamic contact angle measurements on smooth PDMS, PMMA and PU surfaces using water, glycerol, methyl iodide and n-hexadecane. VCA Optima apparatus, (AST products, Inc.) was used. Each sample was tested in four replicates for each liquid, and each replicate was measured at 4 different areas. We applied the Owens' and Zisman's methods, to evaluate the surface energies and critical surface tensions of casted smooth PDMS, PU and PMMA samples. Numbers in brackets are standard errors. SCA – Static Contact Angle, ACA – Advancing Contact Angle, RCA – Receding Contact Angle. “\*” and “\*\*” refer to measurements excluded from calculations of surface energy and critical surface tension due to poor fit, respectively.

|      | water           |                 |                 | glycerol          |                   |                   | methyl iodide  |                |                | n-hexadecane    |                 |                 | Surface energy                      | Critical surface tension           |
|------|-----------------|-----------------|-----------------|-------------------|-------------------|-------------------|----------------|----------------|----------------|-----------------|-----------------|-----------------|-------------------------------------|------------------------------------|
|      | SCA             | ACA             | RCA             | SCA               | ACA               | RCA               | SCA            | ACA            | RCA            | SCA             | ACA             | RCA             |                                     |                                    |
|      |                 |                 |                 |                   |                   |                   |                |                |                |                 |                 |                 |                                     |                                    |
| PDMS | *114.7<br>(0.5) | *120.0<br>(0.7) | *107.6<br>(1.0) | **116.<br>2 (0.3) | **116.<br>9 (0.4) | **109.<br>2 (0.6) | 97.4<br>(0.4)  | 101.3<br>(0.4) | 73.1<br>(0.4)  | 46.1<br>(0.2)   | 40.6<br>(0.5)   | 17.6<br>(0.6)   | **19.54<br>(R <sup>2</sup> =0.6310) | *23.36<br>(R <sup>2</sup> =0.9905) |
| PMMA | 96.4<br>(1.3)   | 98.4<br>(1.6)   | 83.4<br>(1.7)   | 77.5<br>(2.5)     | 79.4<br>(2.5)     | 77.5<br>(2.0)     | *54.3<br>(2.0) | *61.0<br>(2.6) | *43.1<br>(1.8) | 32.0<br>(2.6)   | 29.4<br>(2.5)   | 24.8<br>(2.6)   | *26.07<br>(R <sup>2</sup> =0.9908)  | *20.76<br>(R <sup>2</sup> =0.9974) |
| PU   | 105.9<br>(0.2)  | 114.1<br>(0.6)  | 99.4<br>(0.9)   | *99.0<br>(0.6)    | *98.0<br>(0.3)    | *98.0<br>(1.1)    | 69.2<br>(0.5)  | 79.0<br>(0.4)  | 66.1<br>(0.6)  | **37.3<br>(0.7) | **36.5<br>(0.8) | **33.2<br>(0.7) | *22.3<br>(R <sup>2</sup> =0.9753)   | **23.9<br>(R <sup>2</sup> =0.9634) |

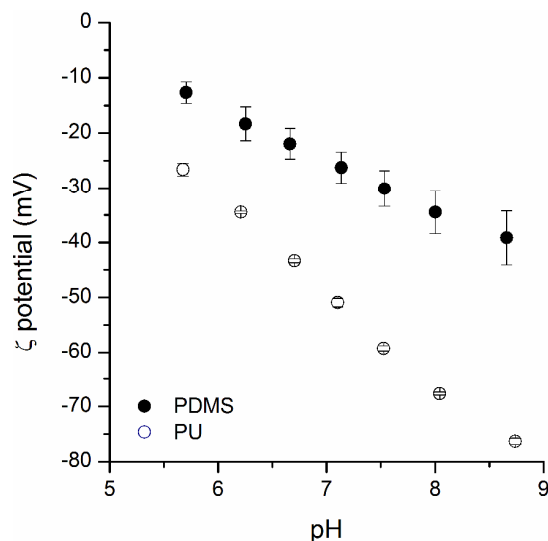

Figure S4.  $\zeta$ -potentials measured on smooth PDMS and PU substrates.

### **Laboratory assays**

To collect additional information about the fouling performance of the polymers studied we subjected the investigated surfaces to diatom (*Halamphora coffeaeformis*) settlement assays. We compared the settlement on smooth polymer samples with the settlement on smooth microscope cover glass reference samples, and the settlement on smooth and patterned polymer samples. The type of the material used had significant effect on *Halamphora* settlement. Unlike the results of the field test, PMMA was the least prone to the settlement of diatoms under laboratory conditions. The number of diatoms settled on PDMS and PMMA was lower than on the respective glass controls, but the number of organisms settled on PU was higher than on the glass control. Depending on the exact composition, the elastic modulus of glass is at least one order of magnitude larger than that of PMMA (PMMA was the hardest polymer in this study). Thus, considering the mechanical properties only, one could expect that glass would be the most prone to the settlement. In this context, the “unexpectedly” higher settlement on PU indicates the importance, or even the prevailing role, of surface parameters other than modulus in the amphora attachment. To test this hypothesis we assessed *Halamphora* settlement on physically (patterning) modified PDMS and PU surfaces using multi-way ANOVA and post-hoc Tukey’s multiple comparisons. We observed no significant difference in number of organisms settled on the tested samples.

### **Statistical analysis of data obtained during mechanical surface tests (surface hardness and modulus)**

Table S2. ANOVA showing the effect of the sample Material (PDMS, PMMA, PU) and of the dimensions of the small features (0 (smooth), 3, or 5  $\mu\text{m}$ ) of the surface Pattern on surface hardness.

|          | Df | Sum Sq | Mean Sq | F value  | Pr(>F)   | Sig.codes |
|----------|----|--------|---------|----------|----------|-----------|
| Material | 2  | 1.3732 | 0.6866  | 529.3832 | < 0.0001 | ***       |

Supporting Information

|                    |    |        |        |        |          |     |
|--------------------|----|--------|--------|--------|----------|-----|
| Pattern            | 2  | 0.0183 | 0.0092 | 7.0532 | 0.0015   | **  |
| Material : Pattern | 4  | 0.0489 | 0.0122 | 9.4290 | < 0.0001 | *** |
| Residuals          | 81 | 0.1051 | 0.0013 |        |          |     |

Tukey's Tests (see S4):

Pattern: PDMS: 0  $\mu\text{m}$  = 3  $\mu\text{m}$  = 5  $\mu\text{m}$ ; PU: 0  $\mu\text{m}$  = 3  $\mu\text{m}$  = 5  $\mu\text{m}$ ; PMMA: 3  $\mu\text{m}$  >\*\*\*0  $\mu\text{m}$  = 5  $\mu\text{m}$

Material: 0  $\mu\text{m}$ , 3  $\mu\text{m}$ , and 5  $\mu\text{m}$ : PMMA > PU = PDMS

Significance codes: '\*\*\*' < 0.001; '\*\*' < 0.01; '\*' < 0.05; '.' < 0.1; '' < 1

Barlett's test: p = 0.0348, Shapiro – Wilk test: p < 0.0001

Table S3. ANOVA showing the effect of the sample Material (PDMS, PMMA, PU) and of the dimensions of the small features (0 (smooth), 3, or 5  $\mu\text{m}$ ) of the surface Pattern on surface modulus.

|                    | Df | Sum Sq | Mean Sq | F value   | Pr(>F)   | Sig. codes |
|--------------------|----|--------|---------|-----------|----------|------------|
| Material           | 2  | 412.85 | 206.426 | 1236.7032 | < 0.0001 | ***        |
| Pattern            | 2  | 2.14   | 1.069   | 6.4068    | 0.0026   | **         |
| Material : Pattern | 4  | 4.00   | 0.999   | 5.9851    | 0.0003   | ***        |
| Residuals          | 81 | 13.52  | 0.167   |           |          |            |

Tukey's tests (see S5):

Pattern: PDMS: 0  $\mu\text{m}$  = 3  $\mu\text{m}$  = 5  $\mu\text{m}$ ; PU: 0  $\mu\text{m}$  = 3  $\mu\text{m}$  = 5  $\mu\text{m}$ ; PMMA: 0  $\mu\text{m}$  = 3  $\mu\text{m}$  > 5  $\mu\text{m}$

Materials: PMMA > PU = PDMS

Significance codes: '\*\*\*' < 0.001; '\*\*' < 0.01; '\*' < 0.05; '.' < 0.1; '' < 1

Bartlett's test: p = 0.4418, Shapiro – Wilk test: p < 0.0001

Table S4. The results of post-hoc Tukey's multiple comparison test of data collected during mechanical test, comparing the effect of the sample Material (PDMS, PMMA, PU) and of the dimensions of small features (0 (smooth), 3, or 5  $\mu\text{m}$ ) of the surface Pattern on surface hardness. Significance levels are marked with colors: green ( $p < 0.001$ ), orange ( $0.001 < p < 0.01$ ), and yellow ( $0.01 < p < 0.05$ ).

|          | PDMS : 0 | PDMS : 3         | PDMS : 5 | PU : 0 | PU : 3 | PU : 5 | PMMA : 0 | PMMA : 3 | PMMA : 5 |
|----------|----------|------------------|----------|--------|--------|--------|----------|----------|----------|
| PDMS : 0 |          | 1.0000           | 1.0000   | 1.0000 | 0.9993 | 1.0000 | < 0.0001 | < 0.0001 | < 0.0001 |
| PDMS : 3 |          |                  | 1.0000   | 1.0000 | 0.9997 | 1.0000 | < 0.0001 | < 0.0001 | < 0.0001 |
| PDMS : 5 |          |                  |          | 1.0000 | 0.9943 | 0.9997 | < 0.0001 | < 0.0001 | < 0.0001 |
| PU : 0   |          |                  |          |        | 0.9981 | 1.0000 | < 0.0001 | < 0.0001 | < 0.0001 |
| PU : 3   |          |                  |          |        |        | 1.0000 | < 0.0001 | < 0.0001 | < 0.0001 |
| PU : 5   |          |                  |          |        |        |        | < 0.0001 | < 0.0001 | < 0.0001 |
| PMMA : 0 | ***      | p < 0.001        |          |        |        |        |          | 0.0008   | 0.2091   |
| PMMA : 3 | **       | 0.001 < p < 0.01 |          |        |        |        |          |          | < 0.0001 |
| PMMA : 5 | *        | 0.01 < p < 0.05  |          |        |        |        |          |          |          |

Table S5. The results of post-hoc Tukey's multiple comparison test of data collected during mechanical test, comparing the effect of the sample Material (PDMS, PMMA, PU) and of the dimensions of small features (0 (smooth), 3, or 5  $\mu\text{m}$ ) of the surface Pattern on surface modulus. Significance levels are marked with colors: green ( $p < 0.001$ ), orange ( $0.001 < p < 0.01$ ), and yellow ( $0.01 < p < 0.05$ ).

Supporting Information

|          | PDMS : 0 | PDMS : 3         | PDMS : 5 | PU : 0 | PU : 3 | PU : 5 | PMMA : 0 | PMMA : 3 | PMMA : 5 |
|----------|----------|------------------|----------|--------|--------|--------|----------|----------|----------|
| PDMS : 0 |          | 1.0000           | 1.0000   | 1.0000 | 0.9999 | 1.0000 | > 0.0001 | > 0.0001 | > 0.0001 |
| PDMS : 3 |          |                  | 1.0000   | 1.0000 | 1.0000 | 1.0000 | > 0.0001 | > 0.0001 | > 0.0001 |
| PDMS : 5 |          |                  |          | 1.0000 | 1.0000 | 1.0000 | > 0.0001 | > 0.0001 | > 0.0001 |
| PU : 0   |          |                  |          |        | 1.0000 | 1.0000 | > 0.0001 | > 0.0001 | > 0.0001 |
| PU : 3   |          |                  |          |        |        | 1.0000 | > 0.0001 | > 0.0001 | > 0.0001 |
| PU : 5   |          |                  |          |        |        |        | > 0.0001 | > 0.0001 | > 0.0001 |
| PMMA : 0 | ***      | p < 0.001        |          |        |        |        |          | 0.9987   | 0.0002   |
| PMMA : 3 | **       | 0.001 < p < 0.01 |          |        |        |        |          |          | > 0.0001 |
| PMMA : 5 | *        | 0.01 < p < 0.05  |          |        |        |        |          |          |          |

**Statistical analysis of data collected during static field immersion tests**

Table S6. ANOVA showing the effect of the sample material (PDMS, PMMA, PU), of the dimensions of small features (0 (smooth), 3, or 5 μm) of the surface Pattern, and of the Pressure (0, 50, and 100 Psi) of water jet applied for surface cleaning on surface fouling during the first immersion test.

|                               | Df | Sum Sq  | Mean Sq | F value | Pr(>F)   | Sig. codes |
|-------------------------------|----|---------|---------|---------|----------|------------|
| Material                      | 2  | 1798.68 | 899.3   | 60.715  | < 0.0001 | ***        |
| Pressure                      | 2  | 136.82  | 68.4    | 4.619   | 0.013    | *          |
| Pattern                       | 2  | 1443.90 | 722.0   | 48.739  | < 0.0001 | ***        |
| Material : Pressure           | 4  | 615.67  | 153.9   | 10.391  | < 0.0001 | ***        |
| Material : Pattern            | 4  | 573.95  | 143.5   | 9.687   | < 0.0001 | ***        |
| Pressure : Pattern            | 4  | 13.65   | 3.4     | 0.230   | 0.920    |            |
| Material : Pressure : Pattern | 8  | 43.33   | 5.4     | 0.366   | 0.935    |            |
| Residuals                     | 72 | 1066.50 | 14.8    |         |          |            |

Tukey's tests (see S7 & S8):

Material x Pressure - Material: 0 Psi: PDMS = PMMA = PU; 50 Psi & 100 Psi: PDMS < PU < PMMA

Material x Pressure - Pressure: PDMS: 0 Psi > 50 Psi = 100 Psi; PU: 0 Psi = 50 Psi, 50 Psi = 100 Psi, 0 Psi > 100 Psi; PMMA: 0 Psi = 50 Psi = 100 Psi

Material x Pattern - Material: 0 μm: PDMS = PMMA < PU; 3 μm: PDMS = PU > PMMA; 5 μm: PDMS < PMMA = PU

Material x Pattern - Pattern: PDMS: 0 μm = 3 μm = 5μ; PMMA: 0 μm < 3 μm, 0 μm = 5 μm, 3 μm = 5 μm; PU: 0 μm = 3 μm, 0 μm = 5 μm, 3 μm < 5 μm

Significance codes: '\*\*\*' <0.001; '\*\*' <0.01; '\*' <0.05; '.' <0.1; '' <1

Bartlett's test: p = 0.0258; Shapiro – Wilk test: p > 0.05.



## Supporting Information

Table S7. The results of post-hoc Tukey's multiple comparison test of data collected during the first immersion test, comparing effect of the sample Material (PDMS, PMMA, PU) and of the Pressure (0, 50, and 100 Psi) used during water jet cleaning on surface fouling. Significance levels are marked with colors: green ( $p < 0.001$ ), orange ( $0.001 < p < 0.01$ ), and yellow ( $0.01 < p < 0.05$ ).

|            | PDMS : 0 | PDMS : 50        | PDMS : 100 | PMMA : 0 | PMMA : 50 | PMMA : 100 | PU : 0   | PU : 50  | PU : 100 |
|------------|----------|------------------|------------|----------|-----------|------------|----------|----------|----------|
| PDMS : 0   |          | > 0.0001         | > 0.0001   | 0.9864   | 1.0000    | 0.9996     | 0.8816   | 0.9359   | 0.0453   |
| PDMS : 50  |          |                  | 0.7137     | > 0.0001 | > 0.0001  | > 0.0001   | > 0.0001 | > 0.0001 | 0.0002   |
| PDMS : 100 |          |                  |            | > 0.0001 | > 0.0001  | > 0.0001   | > 0.0001 | > 0.0001 | > 0.0001 |
| PMMA : 0   |          |                  |            |          | 0.9990    | 0.8656     | 1.0000   | 0.4420   | 0.0049   |
| PMMA : 50  |          |                  |            |          |           | 0.9967     | 0.9775   | 0.8781   | 0.0427   |
| PMMA : 100 |          |                  |            |          |           |            | 0.6059   | 0.9996   | 0.2967   |
| PU : 0     | ***      | p < 0.001        |            |          |           |            |          | 0.1646   | 0.0004   |
| PU : 50    | **       | 0.001 < p < 0.01 |            |          |           |            |          |          | 0.5739   |
| PU : 100   | *        | 0.01 < p < 0.05  |            |          |           |            |          |          |          |

Table S8. The results of post-hoc Tukey's multiple comparison test of data collected during the first immersion test, comparing effect of the sample Material (PDMS, PMMA, PU) and of the dimensions of small features (0 (smooth), 3, or 5  $\mu\text{m}$ ) of the surface Pattern on surface fouling. Significance levels are marked with colors: green ( $p < 0.001$ ), orange ( $0.001 < p < 0.01$ ), and yellow ( $0.01 < p < 0.05$ ).

|          | PDMS : 0 | PDMS : 3         | PDMS : 5 | PMMA : 0 | PMMA : 3 | PMMA : 5 | PU : 0   | PU : 3   | PU : 5   |
|----------|----------|------------------|----------|----------|----------|----------|----------|----------|----------|
| PDMS : 0 |          | 1.0000           | 0.9703   | 0.1466   | > 0.0001 | 0.0003   | 0.0012   | 0.1302   | > 0.0001 |
| PDMS : 3 |          |                  | 0.9840   | 0.1152   | > 0.0001 | 0.0002   | 0.0008   | 0.1017   | > 0.0001 |
| PDMS : 5 |          |                  |          | 0.0069   | > 0.0001 | > 0.0001 | > 0.0001 | 0.0058   | > 0.0001 |
| PMMA : 0 |          |                  |          |          | > 0.0001 | 0.0793   | 0.7772   | 1.0000   | 0.0081   |
| PMMA : 3 |          |                  |          |          |          | 0.9993   | 0.0029   | > 0.0001 | 0.5739   |
| PMMA : 5 |          |                  |          |          |          |          | 0.5626   | 0.0862   | 0.9995   |
| PU : 0   | ***      | p < 0.001        |          |          |          |          |          | 0.8064   | 0.4330   |
| PU : 3   | **       | 0.001 < p < 0.01 |          |          |          |          |          |          | 0.0096   |
| PU : 5   | *        | 0.01 < p < 0.05  |          |          |          |          |          |          |          |

Table S9. ANOVA showing the effect of the coating Material (PDMS, PMMA, PU), of the dimensions of small features (0 (smooth), 3, or 5  $\mu\text{m}$ ) of the surface Pattern, and of the Pressure (0, 50, and 100 Psi) of water jet applied for surface cleaning on surface fouling during the second immersion test.

|                               | Df | Sum Sq  | Mean Sq | F value | Pr(>F)   | Sig. codes |
|-------------------------------|----|---------|---------|---------|----------|------------|
| Material                      | 2  | 15548.1 | 7774.1  | 51.078  | < 0.0001 | ***        |
| Pressure [psi]                | 2  | 4965.6  | 2482.8  | 16.313  | < 0.0001 | ***        |
| Pattern [ $\mu\text{m}$ ]     | 2  | 3440.1  | 1720    | 11.301  | < 0.0001 | ***        |
| Material : Pressure           | 4  | 1674    | 418.5   | 2.750   | 0.0345   | *          |
| Material : Pattern            | 4  | 5807.7  | 1451.9  | 9.540   | < 0.0001 | ***        |
| Pressure : Pattern            | 4  | 814.6   | 203.6   | 1.338   | 0.2642   |            |
| Material : Pressure : Pattern | 8  | 524.2   | 65.5    | 0.431   | 0.8990   |            |
| Residuals                     | 72 | 10958.5 | 152.2   |         |          |            |

Tukey's tests (see S10 & S11):

Material x Pressure - Material: 0 Psi: PDMS = PMMA = PU; 50 Psi & 100 Psi:

PDMS < PU = PMMA

Material x Pressure - Pressure: PDMS: 0 Psi = 50 Psi, 50 Psi = 100 Psi, 0 Psi >

100 Psi; PU & PMMA: 0 Psi = 50 Psi = 100 Psi

Material x Pattern - Material: 0  $\mu\text{m}$  : PDMS = PMMA > PU; 3  $\mu\text{m}$  & 5  $\mu\text{m}$ :

PDMS < PU = PMMA

Material x Pattern - Pattern: PDMS & PU: 0  $\mu\text{m}$  = 3  $\mu\text{m}$  = 5  $\mu\text{m}$ ; PMMA: 0  $\mu\text{m}$  <



Supporting Information

3 μm = 5 μm

Significance codes: '\*\*\*' <0.001; '\*\*' <0.01; '\*' <0.05; '.' <0.1.

Bartlett & Shapiro – Wilk tests: p > 0.05

Table S10. The results of post-hoc Tukey’s multiple comparison test of data collected during the second immersion test, comparing effect of the sample Material (PDMS, PMMA, PU) and of the Pressure (0, 50, and 100 Psi) used during water jet cleaning on surface fouling. Significance levels are marked with colors: green (p < 0.001), orange (0.001 < p < 0.01), and yellow (0.01 < p < 0.05).

|            | PDMS : 0 | PDMS : 50        | PDMS : 100 | PMMA : 0 | PMMA : 50 | PMMA : 100 | PU : 0   | PU : 50  | PU : 100 |
|------------|----------|------------------|------------|----------|-----------|------------|----------|----------|----------|
| PDMS : 0   |          | 0.0337           | < 0.0001   | 0.2813   | 0.2510    | 0.9797     | 0.0842   | 0.0776   | 0.9999   |
| PDMS : 50  |          |                  | 0.3276     | < 0.0001 | < 0.0001  | 0.0028     | < 0.0001 | < 0.0001 | 0.0081   |
| PDMS : 100 |          |                  |            | < 0.0001 | < 0.0001  | < 0.0001   | < 0.0001 | < 0.0001 | < 0.0001 |
| PMMA : 0   |          |                  |            |          |           | 1.0000     | 0.9284   | 1.0000   | 0.5543   |
| PMMA : 50  |          |                  |            |          |           |            | 0.9100   | 1.0000   | 0.5130   |
| PMMA : 100 |          |                  |            |          |           |            |          | 0.7288   | 0.9995   |
| PU : 0     |          |                  |            |          |           |            |          |          | 1.0000   |
| PU : 50    |          |                  |            |          |           |            |          |          |          |
| PU : 100   |          |                  |            |          |           |            |          |          |          |
|            | ***      | p < 0.001        |            |          |           |            |          |          |          |
|            | **       | 0.001 < p < 0.01 |            |          |           |            |          |          |          |
|            | *        | 0.01 < p < 0.05  |            |          |           |            |          |          |          |

Table S11. The results of post-hoc Tukey’s multiple comparison test of data collected during the second immersion test, comparing effect of the sample Material (PDMS, PMMA, PU) and of the dimensions of small features (0 (smooth), 3, or 5 μm) of the surface Pattern on surface fouling. Significance levels are marked with colors: green (p < 0.001), orange (0.001 < p < 0.01), and yellow (0.01 < p < 0.05).

|          | PDMS : 0 | PDMS : 3         | PDMS : 5 | PMMA : 0 | PMMA : 3 | PMMA : 5 | PU : 0   | PU : 3   | PU : 5   |
|----------|----------|------------------|----------|----------|----------|----------|----------|----------|----------|
| PDMS : 0 |          | 0.9997           | 0.9998   | 0.8643   | < 0.0001 | < 0.0001 | < 0.0001 | < 0.0001 | < 0.0001 |
| PDMS : 3 |          |                  | 1.0000   | 0.9917   | < 0.0001 | < 0.0001 | 0.0003   | 0.0002   | < 0.0001 |
| PDMS : 5 |          |                  |          | 0.9895   | < 0.0001 | < 0.0001 | 0.0002   | 0.0002   | < 0.0001 |
| PMMA : 0 |          |                  |          |          | < 0.0001 | < 0.0001 | 0.0065   | 0.0050   | 0.0014   |
| PMMA : 3 |          |                  |          |          |          |          | 0.9889   | 0.0629   | 0.0776   |
| PMMA : 5 |          |                  |          |          |          |          |          | 0.1011   | 0.1144   |
| PU : 0   |          |                  |          |          |          |          |          |          | 1.0000   |
| PU : 3   |          |                  |          |          |          |          |          |          |          |
| PU : 5   |          |                  |          |          |          |          |          |          |          |
|          | ***      | p < 0.001        |          |          |          |          |          |          |          |
|          | **       | 0.001 < p < 0.01 |          |          |          |          |          |          |          |
|          | *        | 0.01 < p < 0.05  |          |          |          |          |          |          |          |
